# Supplementary material for: Association of Plasma Metabolic Biomarker Sphingosine-1-Phosphate With Cerebral Collateral Circulation in Acute Ischemic Stroke
Source: PubMed Central journal article supplement (PMC8416917; doi:10.3389/fphys.2021.720672), 2021-08-19
Supplement: Data_Sheet_2.pdf [file Data_Sheet_2.pdf]

Table S1 Detailed list of altered metabolites between AIS patients and control.

| Compound name                                    | mz       | rt       | Formula     | p        | VIP    | Fold Change | KEGG ID | Ion mode |
|--------------------------------------------------|----------|----------|-------------|----------|--------|-------------|---------|----------|
| 9,10-DHOME                                       | 313.2386 | 761.9115 | C18H34O4    | 6.43E-08 | 2.638  | 2.7651      | C14828  | Negative |
| 12,13-DHOME                                      | 313.2386 | 761.9115 | C18H34O4    | 6.43E-08 | 2.638  | 2.7651      | C14829  | Negative |
| trans,trans-Farnesyl diphosphate                 | 381.119  | 451.954  | C15H28O7P2  | 3.11E-07 | 2.5161 | 6.7933      | C00448  | Negative |
| Presqualene diphosphate                          | 625.2841 | 864.761  | C30H52O7P2  | 3.79E-07 | 2.5001 | 0.58835     | C03428  | Positive |
| Inosine                                          | 267.0735 | 363.325  | C10H12N4O5  | 1.85E-06 | 2.3658 | 1.7823      | C00294  | Negative |
| L-Glutamine                                      | 145.0624 | 50.9035  | C5H10N2O3   | 2.76E-06 | 2.3303 | 0.81105     | C00064  | Negative |
| cis-4-(1'-Hydroxynaphth-2'-yl)-2-oxobut-3-enoate | 243.0625 | 476.396  | C14H10O4    | 5.10E-06 | 2.2739 | 3.3935      | C11426  | Positive |
| 4-(3-Hydroxy-2-naphthyl)-2-oxobut-3-enoic acid   | 243.0625 | 476.396  | C14H10O4    | 5.10E-06 | 2.2739 | 3.3935      | C16210  | Positive |
| Phenylacetylglutamine                            | 265.1183 | 412.1335 | C13H16N2O4  | 5.40E-06 | 2.2685 | 2.2693      | C04148  | Positive |
| Hypoxanthine                                     | 137.046  | 72       | C5H4N4O     | 1.44E-05 | 2.174  | 1.577       | C00262  | Positive |
| Phenylacetylglutamine                            | 263.1041 | 409.0855 | C13H16N2O4  | 2.47E-05 | 2.119  | 2.1268      | C04148  | Negative |
| Ornithine                                        | 131.083  | 53.527   | C5H12N2O2   | 4.47E-05 | 2.0569 | 0.7411      | C00077  | Negative |
| L-Carnitine                                      | 162.112  | 54       | C7H15NO3    | 5.04E-05 | 2.0441 | 1.242       | C00318  | Positive |
| p-Aminobenzoic acid                              | 138.055  | 60       | C7H7NO2     | 6.13E-05 | 2.0229 | 0.52269     | C00568  | Positive |
| Trigonelline                                     | 138.055  | 60       | C7H7NO2     | 6.13E-05 | 2.0229 | 0.52269     | C01004  | Positive |
| N-Acetylputrescine                               | 131.1175 | 413.0885 | C6H14N2O    | 7.24E-05 | 2.0045 | 1.5989      | C02714  | Positive |
| 3-Hydroxybutyric acid                            | 103.04   | 96       | C4H8O3      | 7.42E-05 | 2.0018 | 2.7373      | C01089  | Negative |
| L-Citrulline                                     | 174.0885 | 53.604   | C6H13N3O3   | 0.000122 | 1.9456 | 0.74043     | C00327  | Negative |
| 2-Amino-3-carboxymuconate semialdehyde           | 203.0696 | 476.406  | C10H12O3    | 0.000148 | 1.9233 | 2.2996      | C04409  | Positive |
| Catechol                                         | 109.0303 | 387.223  | C6H6O2      | 0.00022  | 1.8768 | 0.56194     | C00090  | Negative |
| Hydroquinone                                     | 109.0303 | 387.223  | C6H6O2      | 0.00022  | 1.8768 | 0.56194     | C00530  | Negative |
| Pantetheine                                      | 277.1229 | 388.3895 | C11H22N2O4S | 0.000237 | 1.8678 | 1.2143      | C00831  | Negative |

|                                     |          |          |                |          |        |         |        |          |
|-------------------------------------|----------|----------|----------------|----------|--------|---------|--------|----------|
| Aflatoxin B2                        | 315.0795 | 375.577  | C17H14O6       | 0.00026  | 1.8566 | 2.2467  | C16753 | Positive |
| 3,4-Dihydroxybenzoate               | 153.0196 | 438.028  | C7H6O4         | 0.000289 | 1.8436 | 0.62463 | C00230 | Negative |
| L-Leucine                           | 132.1019 | 184.215  | C6H13NO2       | 0.000301 | 1.8384 | 1.3789  | C00123 | Positive |
| Taurine                             | 124.007  | 48       | C2H7NO3S       | 0.000329 | 1.8275 | 0.77376 | C00245 | Negative |
| 2-Hydroxy-3-phenylpropenoate        | 199.0072 | 482.643  | C9H8O3         | 0.000332 | 1.8265 | 0.40684 | C02763 | Negative |
| Indole                              | 173.0726 | 480.476  | C10H10N2O      | 0.000389 | 1.8069 | 3.7238  | C00463 | Negative |
| 2-Aminophenol                       | 132.0441 | 401.588  | C6H7NO         | 0.000463 | 1.7849 | 1.5905  | C01987 | Positive |
| 1,2-Bis(4-hydroxyphenyl)-2-propanol | 267.109  | 423.385  | C15H16O3       | 0.000692 | 1.7328 | 1.4451  | C13629 | Positive |
| L-Aspartate                         | 132.0306 | 51.119   | C4H7NO4        | 0.000748 | 1.7225 | 1.2522  | C00049 | Negative |
| Anisole                             | 107.0511 | 451.379  | C7H8O          | 0.000937 | 1.6925 | 2.5719  | C01403 | Negative |
| Benzyl alcohol                      | 107.0511 | 451.379  | C7H8O          | 0.000937 | 1.6925 | 2.5719  | C03485 | Negative |
| Dephospho-CoA                       | 688.1699 | 385.0765 | C21H35N7O13P2S | 0.001049 | 1.6771 | 0.61076 | C00882 | Positive |
| (Indol-3-yl) acetamide              | 175.0862 | 482.73   | C10H10N2O      | 0.001049 | 1.6772 | 3.5286  | C02693 | Positive |
| Cortisol                            | 422.2602 | 463.211  | C23H32O6       | 0.001252 | 1.6528 | 2.1261  | C00735 | Positive |
| Salicin 6-phosphate                 | 367.0812 | 492.972  | C13H19O10P     | 0.001576 | 1.6206 | 3.5879  | C06188 | Positive |
| Stearidonic acid                    | 277.2161 | 998.08   | C18H28O2       | 0.001631 | 1.6158 | 0.71957 | C16300 | Positive |
| Corticosterone                      | 381.174  | 580.003  | C21H30O4       | 0.001676 | 1.6119 | 0.7183  | C02140 | Negative |
| p-Cumate                            | 199.059  | 427.71   | C10H12O2       | 0.002138 | 1.5768 | 1.2974  | C06578 | Negative |
| Catechol                            | 128.0704 | 378.5845 | C6H6O2         | 0.002486 | 1.5547 | 1.4175  | C00090 | Positive |
| Androsta-1,4-diene-3,17-dione       | 285.1878 | 550.191  | C19H24O2       | 0.002633 | 1.5462 | 0.62837 | C20144 | Positive |
| Ajmaline                            | 349.1832 | 395.131  | C20H26N2O2     | 0.002731 | 1.5407 | 5.6634  | C06542 | Positive |
| 20-COOH-Leukotriene B4              | 384.2356 | 440.818  | C20H30O6       | 0.002886 | 1.5324 | 2.7049  | C05950 | Positive |
| Itaconic acid                       | 129.019  | 78       | C5H6O4         | 0.002999 | 1.5267 | 0.70708 | C00490 | Negative |
| Citraconic acid                     | 129.019  | 78       | C5H6O4         | 0.002999 | 1.5267 | 0.70708 | C02226 | Negative |
| cis-1,2-Dihydro-3-ethylcatechol     | 158.1171 | 390.093  | C8H12O2        | 0.003188 | 1.5174 | 0.73033 | C06727 | Positive |
| Prostaglandin H2                    | 353.2298 | 642.832  | C20H32O5       | 0.00329  | 1.5126 | 1.2038  | C00427 | Positive |

|                                                      |          |          |               |          |        |         |        |          |
|------------------------------------------------------|----------|----------|---------------|----------|--------|---------|--------|----------|
| 2-Fluorocyclohexadiene-cis-1,2-diol-1-carboxylate    | 175.0385 | 463.866  | C7H7FO4       | 0.003373 | 1.5088 | 2.2586  | C16482 | Positive |
| trans-o-Hydroxybenzylidenepyruvate                   | 191.0351 | 462.624  | C10H8O4       | 0.003401 | 1.5075 | 2.108   | C06203 | Negative |
| Aniline                                              | 128.0359 | 363.512  | C6H7N         | 0.003557 | 1.5007 | 1.2396  | C00292 | Negative |
| 11beta,21-Dihydroxy-5beta-pregnane-3,20-dione        | 371.2281 | 401.138  | C21H32O4      | 0.003797 | 1.4906 | 20.762  | C05475 | Positive |
| 3alpha,21-Dihydroxy-5beta-pregnane-11,20-dione       | 371.2281 | 401.138  | C21H32O4      | 0.003797 | 1.4906 | 20.762  | C05478 | Positive |
| 5-Hydroxyisourate                                    | 218.997  | 417.795  | C5H4N4O4      | 0.003821 | 1.4896 | 0.21788 | C11821 | Negative |
| Creatine                                             | 132.077  | 60       | C4H9N3O2      | 0.004512 | 1.4637 | 1.3973  | C00300 | Positive |
| Xanthine                                             | 153.0404 | 178.6885 | C5H4N4O2      | 0.004953 | 1.449  | 1.2891  | C00385 | Positive |
| 5'-Benzoylphosphoadenosine                           | 490.0495 | 483.936  | C17H18N5O8P   | 0.005478 | 1.4328 | 1.5882  | C06433 | Positive |
| Glycochenodeoxycholate 7-sulfate                     | 528.2641 | 588.299  | C26H43NO8S    | 0.005819 | 1.4231 | 2.0976  | C01324 | Negative |
| (1E,3E)-4-Hydroxybuta-1,3-diene-1,2,4-tricarboxylate | 203.0224 | 390.5395 | C7H6O7        | 0.006439 | 1.4066 | 1.2982  | C04324 | Positive |
| (1E)-4-Oxobut-1-ene-1,2,4-tricarboxylate             | 203.0224 | 390.5395 | C7H6O7        | 0.006439 | 1.4066 | 1.2982  | C04434 | Positive |
| CMP-N-glycolylneuraminate                            | 595.1291 | 490.398  | C15H25N5O15P2 | 0.006689 | 1.4004 | 1.7595  | C03691 | Positive |
| 4-Methylumbelliferyl acetate                         | 217.051  | 490.745  | C12H10O4      | 0.006932 | 1.3945 | 2.7402  | C03837 | Negative |
| trans-Zeatin riboside                                | 534.0759 | 487.245  | C15H23N5O11P2 | 0.006944 | 1.3942 | 1.9095  | C16429 | Positive |
| 5-Hydroxy-N-formylkynurenine                         | 287.0463 | 183.53   | C11H12N2O5    | 0.00708  | 1.391  | 1.3442  | C05648 | Negative |
| Isocitrate                                           | 191.0199 | 134.558  | C6H8O7        | 0.007756 | 1.3758 | 0.74461 | C00311 | Negative |
| N-Formyl-L-glutamate                                 | 198.0433 | 390.7945 | C6H9NO5       | 0.008175 | 1.367  | 1.3657  | C01045 | Positive |
| 4,4'-Diapolycopene                                   | 418.3396 | 912.243  | C30H40        | 0.008277 | 1.3649 | 0.66572 | C19797 | Positive |
| L-2-Aminoadipate adenylate                           | 529.0894 | 485.806  | C16H23N6O10P  | 0.008707 | 1.3563 | 1.8653  | C05560 | Positive |
| Formyl-5 hydroxykynurenamine                         | 243.0623 | 213.162  | C10H12N2O3    | 0.008836 | 1.3538 | 0.7851  | C05647 | Negative |
| (9Z)-Hexadecenoic acid                               | 253.2175 | 1091.07  | C16H30O2      | 0.009005 | 1.3506 | 1.506   | C08362 | Negative |
| 5-Sulfosalicylate                                    | 216.9808 | 383.1945 | C7H6O6S       | 0.009295 | 1.3452 | 1.4542  | C16199 | Negative |
| UMP                                                  | 323.0228 | 182.443  | C9H13N2O9P    | 0.010088 | 1.3311 | 1.7004  | C00105 | Negative |

|                                                          |          |          |                |          |        |         |        |          |
|----------------------------------------------------------|----------|----------|----------------|----------|--------|---------|--------|----------|
| 1-(5'-Phosphoribosyl)-5-formamido-4-imidazolecarboxamide | 384.0987 | 489.1525 | C10H15N4O9P    | 0.010441 | 1.3251 | 2.8715  | C04734 | Positive |
| 6-Aminohexanoate                                         | 132.1017 | 373.1175 | C6H13NO2       | 0.011063 | 1.3151 | 1.3484  | C02378 | Positive |
| Pyruvic acid                                             | 87.009   | 72       | C3H4O3         | 0.012451 | 1.2942 | 0.80565 | C00022 | Negative |
| 20-Hydroxyleukotriene E4                                 | 490.197  | 510.279  | C23H37NO6S     | 0.013069 | 1.2856 | 0.6415  | C03577 | Negative |
| S-(4 Methylthiobutylthiohydroximoyl)-L-cysteine          | 275.0487 | 516.185  | C8H16N2O3S2    | 0.014825 | 1.2629 | 0.80115 | C17242 | Positive |
| Isopentenyladenosine-5'-diphosphate                      | 518.0831 | 485.021  | C15H23N5O10P2  | 0.015448 | 1.2554 | 1.8111  | C16426 | Positive |
| O-Acetylcarnitine                                        | 204.1226 | 102.7065 | C9H17NO4       | 0.016062 | 1.2483 | 1.4517  | C02571 | Positive |
| (15S)-15-Hydroxy-5,8,11-cis-13-trans-eicosatetraenoate   | 303.2316 | 535.261  | C20H32O3       | 0.016637 | 1.2418 | 0.69335 | C04742 | Positive |
| 2-Hydroxyadipate                                         | 180.0873 | 376.484  | C6H10O5        | 0.017399 | 1.2335 | 1.2252  | C02360 | Positive |
| (2R,3S)-2,3-Dimethylmalate                               | 180.0873 | 376.484  | C6H10O5        | 0.017399 | 1.2335 | 1.2252  | C03652 | Positive |
| Linoleate                                                | 279.2333 | 1114.46  | C18H32O2       | 0.018349 | 1.2236 | 1.3586  | C01595 | Negative |
| Xylose                                                   | 151.0635 | 373.779  | C5H10O5        | 0.024241 | 1.1706 | 1.2462  | C00181 | Positive |
| L-Xylulose                                               | 151.0635 | 373.779  | C5H10O5        | 0.024241 | 1.1706 | 1.2462  | C00312 | Positive |
| Vanillate                                                | 167.0351 | 463.489  | C8H8O4         | 0.026488 | 1.1532 | 0.76733 | C06672 | Negative |
| Caffeine                                                 | 195.0871 | 403.007  | C8H10N4O2      | 0.026725 | 1.1514 | 0.15361 | C07481 | Positive |
| Cholesterol sulfate                                      | 465.3053 | 539.0965 | C27H46O4S      | 0.027262 | 1.1475 | 0.54066 | C18043 | Negative |
| Glycocholate                                             | 464.3019 | 539.1315 | C26H43NO6      | 0.027608 | 1.145  | 0.54551 | C01921 | Negative |
| ADP-5-ethyl-4-methylthiazole-2-carboxylate               | 579.0359 | 504.57   | C17H22N6O12P2S | 0.02803  | 1.142  | 1.4346  | C20784 | Positive |
| Paraoxon                                                 | 293.0814 | 566.876  | C10H14NO6P     | 0.032394 | 1.1129 | 0.82967 | C06606 | Positive |
| 21-Hydroxypregnenolone                                   | 355.2327 | 424.7595 | C21H32O3       | 0.033542 | 1.1058 | 1.2198  | C05485 | Positive |
| 7alpha Hydroxypregnenolone                               | 355.2327 | 424.7595 | C21H32O3       | 0.033542 | 1.1058 | 1.2198  | C18038 | Positive |
| Ursodeoxycholic acid                                     | 391.285  | 612      | C24H40O4       | 0.033991 | 1.1031 | 0.52072 | C07880 | Negative |
| Hyodeoxycholic acid                                      | 391.285  | 612      | C24H40O4       | 0.033991 | 1.1031 | 0.52072 | C15517 | Negative |
| Riboflavin                                               | 377.1448 | 402.146  | C17H20N4O6     | 0.034421 | 1.1005 | 3.7147  | C00255 | Positive |

|                                              |          |          |            |          |        |         |        |          |
|----------------------------------------------|----------|----------|------------|----------|--------|---------|--------|----------|
| 2-Phenylacetamide                            | 134.0616 | 413.7425 | C8H9NO     | 0.034756 | 1.0985 | 0.69739 | C02505 | Negative |
| (E)-Phenylacetaldoxime                       | 134.0616 | 413.7425 | C8H9NO     | 0.034756 | 1.0985 | 0.69739 | C19714 | Negative |
| trans-Zeatin riboside diphosphate            | 352.1655 | 425.029  | C15H21N5O5 | 0.035989 | 1.0914 | 0.81328 | C16431 | Positive |
| Glycocholate                                 | 466.3162 | 539.3845 | C26H43NO6  | 0.036747 | 1.087  | 0.58589 | C01921 | Positive |
| Theophylline                                 | 181.0716 | 386.187  | C7H8N4O2   | 0.03728  | 1.0841 | 0.20806 | C07130 | Positive |
| 1,7-Dimethylxanthine                         | 181.0716 | 386.187  | C7H8N4O2   | 0.03728  | 1.0841 | 0.20806 | C13747 | Positive |
| N-Acetylanthranilate                         | 178.0545 | 394.782  | C9H9NO3    | 0.037506 | 1.0828 | 0.6168  | C06332 | Negative |
| Hippurate                                    | 178.0513 | 413.718  | C9H9NO3    | 0.038614 | 1.0767 | 0.66972 | C01586 | Negative |
| Pipecolic acid                               | 130.086  | 72       | C6H11NO2   | 0.039187 | 1.0736 | 0.78559 | C00408 | Positive |
| 5alpha Dihydrodeoxycorticosterone            | 367.1966 | 559.084  | C21H32O3   | 0.039627 | 1.0713 | 1.598   | C18040 | Negative |
| L-Palmitoylcarnitine                         | 400.3422 | 738.3285 | C23H45NO4  | 0.039729 | 1.0708 | 0.75861 | C02990 | Positive |
| Indolepyruvate                               | 204.0606 | 390.7955 | C11H9NO3   | 0.040985 | 1.0642 | 1.2446  | C00331 | Positive |
| Benzene-1,2,4-triol                          | 127.0388 | 506.199  | C6H6O3     | 0.041622 | 1.061  | 0.74349 | C02814 | Positive |
| 7-Dehydrodesmosterol                         | 383.3307 | 590.169  | C27H42O    | 0.043958 | 1.0493 | 1.3823  | C05107 | Positive |
| Progesterone                                 | 315.236  | 492.35   | C17H28O4   | 0.044559 | 1.0464 | 0.74867 | C00410 | Positive |
| (4Z,7Z,10Z,13Z,16Z,19Z)-Docosahexaenoic acid | 329.2476 | 1092.285 | C22H32O2   | 0.044705 | 1.0457 | 0.6268  | C06429 | Positive |
| Glyceric acid                                | 105.019  | 60       | C3H6O4     | 0.045658 | 1.0412 | 0.74266 | C00258 | Negative |
| Salicyluric acid                             | 194.0462 | 440.877  | C9H9NO4    | 0.046218 | 1.0386 | 1.995   | C07588 | Negative |

Table S2 Result of metabolic enrichment analysis between AIS patients and control.

| Pathways                                    | total | expected | hits | Raw p  |
|---------------------------------------------|-------|----------|------|--------|
| Arginine biosynthesis                       | 14    | 1.2      | 4    | 0.0266 |
| D-Glutamine and D-glutamate metabolism      | 6     | 0.516    | 2    | 0.0876 |
| Caffeine metabolism                         | 10    | 0.861    | 2    | 0.21   |
| Phenylalanine metabolism                    | 10    | 0.861    | 2    | 0.21   |
| Pantothenate and CoA biosynthesis           | 19    | 1.64     | 3    | 0.22   |
| Glyoxylate and dicarboxylate metabolism     | 32    | 2.75     | 4    | 0.294  |
| Riboflavin metabolism                       | 4     | 0.344    | 1    | 0.303  |
| Linoleic acid metabolism                    | 5     | 0.43     | 1    | 0.363  |
| Arginine and proline metabolism             | 38    | 3.27     | 4    | 0.416  |
| Nitrogen metabolism                         | 6     | 0.516    | 1    | 0.418  |
| Alanine, aspartate and glutamate metabolism | 28    | 2.41     | 3    | 0.438  |
| Steroid hormone biosynthesis                | 85    | 7.32     | 8    | 0.451  |
| Pentose and glucuronate interconversions    | 18    | 1.55     | 2    | 0.468  |
| Tryptophan metabolism                       | 41    | 3.53     | 4    | 0.476  |
| Valine, leucine and isoleucine biosynthesis | 8     | 0.689    | 1    | 0.514  |
| Taurine and hypotaurine metabolism          | 8     | 0.689    | 1    | 0.514  |
| Citrate cycle (TCA cycle)                   | 20    | 1.72     | 2    | 0.525  |
| Glycine, serine and threonine metabolism    | 33    | 2.84     | 3    | 0.551  |
| Purine metabolism                           | 65    | 5.59     | 5    | 0.673  |
| alpha-Linolenic acid metabolism             | 13    | 1.12     | 1    | 0.691  |
| Steroid biosynthesis                        | 42    | 3.61     | 3    | 0.717  |
| Nicotinate and nicotinamide metabolism      | 15    | 1.29     | 1    | 0.742  |
| Histidine metabolism                        | 16    | 1.38     | 1    | 0.765  |

---

|                                             |    |      |   |       |
|---------------------------------------------|----|------|---|-------|
| Glycerolipid metabolism                     | 16 | 1.38 | 1 | 0.765 |
| Aminoacyl-tRNA biosynthesis                 | 48 | 4.13 | 3 | 0.798 |
| Terpenoid backbone biosynthesis             | 18 | 1.55 | 1 | 0.804 |
| Arachidonic acid metabolism                 | 36 | 3.1  | 2 | 0.831 |
| Biosynthesis of unsaturated fatty acids     | 36 | 3.1  | 2 | 0.831 |
| beta-Alanine metabolism                     | 21 | 1.81 | 1 | 0.851 |
| Pyrimidine metabolism                       | 39 | 3.36 | 2 | 0.864 |
| Pentose phosphate pathway                   | 22 | 1.89 | 1 | 0.864 |
| Pyruvate metabolism                         | 22 | 1.89 | 1 | 0.864 |
| Lysine degradation                          | 25 | 2.15 | 1 | 0.897 |
| Glycolysis / Gluconeogenesis                | 26 | 2.24 | 1 | 0.906 |
| Primary bile acid biosynthesis              | 46 | 3.96 | 2 | 0.918 |
| Glutathione metabolism                      | 28 | 2.41 | 1 | 0.921 |
| Cysteine and methionine metabolism          | 33 | 2.84 | 1 | 0.95  |
| Amino sugar and nucleotide sugar metabolism | 37 | 3.18 | 1 | 0.966 |
| Fatty acid degradation                      | 39 | 3.36 | 1 | 0.971 |
| Valine, leucine and isoleucine degradation  | 40 | 3.44 | 1 | 0.974 |
| Tyrosine metabolism                         | 42 | 3.61 | 1 | 0.978 |

---

Table S3 Result of KEGG metabolic pathways analysis between AIS patients and control.

| Pathway                                     | Total | Expected | Hits | Raw p    |
|---------------------------------------------|-------|----------|------|----------|
| Arginine biosynthesis                       | 14    | 1.0026   | 4    | 0.014232 |
| Steroid hormone biosynthesis                | 85    | 6.0871   | 9    | 0.14819  |
| Pantothenate and CoA biosynthesis           | 19    | 1.3606   | 3    | 0.15013  |
| Phenylalanine metabolism                    | 10    | 0.71613  | 2    | 0.15703  |
| Caffeine metabolism                         | 10    | 0.71613  | 2    | 0.15703  |
| Glyoxylate and dicarboxylate metabolism     | 32    | 2.2916   | 4    | 0.19171  |
| Riboflavin metabolism                       | 4     | 0.28645  | 1    | 0.25735  |
| Arginine and proline metabolism             | 38    | 2.7213   | 4    | 0.28715  |
| Synthesis and degradation of ketone bodies  | 5     | 0.35806  | 1    | 0.31067  |
| Linoleic acid metabolism                    | 5     | 0.35806  | 1    | 0.31067  |
| Alanine, aspartate and glutamate metabolism | 28    | 2.0052   | 3    | 0.32447  |
| Tryptophan metabolism                       | 41    | 2.9361   | 4    | 0.33738  |
| D-Glutamine and D-glutamate metabolism      | 6     | 0.42968  | 1    | 0.36019  |
| Nitrogen metabolism                         | 6     | 0.42968  | 1    | 0.36019  |
| Pentose and glucuronate interconversions    | 18    | 1.289    | 2    | 0.37351  |
| Glycine, serine and threonine metabolism    | 33    | 2.3632   | 3    | 0.42501  |
| Citrate cycle (TCA cycle)                   | 20    | 1.4323   | 2    | 0.42555  |
| Valine, leucine and isoleucine biosynthesis | 8     | 0.5729   | 1    | 0.44891  |
| Taurine and hypotaurine metabolism          | 8     | 0.5729   | 1    | 0.44891  |
| Purine metabolism                           | 65    | 4.6548   | 5    | 0.50396  |
| Steroid biosynthesis                        | 42    | 3.0077   | 3    | 0.58991  |
| alpha-Linolenic acid metabolism             | 13    | 0.93097  | 1    | 0.62087  |
| Butanoate metabolism                        | 15    | 1.0742   | 1    | 0.67367  |



---

|                                             |    |        |   |         |
|---------------------------------------------|----|--------|---|---------|
| Nicotinate and nicotinamide metabolism      | 15 | 1.0742 | 1 | 0.67367 |
| Aminoacyl-tRNA biosynthesis                 | 48 | 3.4374 | 3 | 0.68177 |
| Histidine metabolism                        | 16 | 1.1458 | 1 | 0.69727 |
| Glycerolipid metabolism                     | 16 | 1.1458 | 1 | 0.69727 |
| Terpenoid backbone biosynthesis             | 18 | 1.289  | 1 | 0.73951 |
| Biosynthesis of unsaturated fatty acids     | 36 | 2.5781 | 2 | 0.74329 |
| Arachidonic acid metabolism                 | 36 | 2.5781 | 2 | 0.74329 |
| Pyrimidine metabolism                       | 39 | 2.7929 | 2 | 0.7828  |
| beta-Alanine metabolism                     | 21 | 1.5039 | 1 | 0.79216 |
| Pentose phosphate pathway                   | 22 | 1.5755 | 1 | 0.80725 |
| Pyruvate metabolism                         | 22 | 1.5755 | 1 | 0.80725 |
| Lysine degradation                          | 25 | 1.7903 | 1 | 0.8463  |
| Primary bile acid biosynthesis              | 46 | 3.2942 | 2 | 0.855   |
| Glycolysis / Gluconeogenesis                | 26 | 1.8619 | 1 | 0.85749 |
| Glutathione metabolism                      | 28 | 2.0052 | 1 | 0.8775  |
| Cysteine and methionine metabolism          | 33 | 2.3632 | 1 | 0.91615 |
| Amino sugar and nucleotide sugar metabolism | 37 | 2.6497 | 1 | 0.93815 |
| Fatty acid degradation                      | 39 | 2.7929 | 1 | 0.94689 |
| Valine, leucine and isoleucine degradation  | 40 | 2.8645 | 1 | 0.9508  |
| Tyrosine metabolism                         | 42 | 3.0077 | 1 | 0.95777 |

---

Table S4 Detailed list of altered metabolites between GCC and PCC patients

| Compound name                                     | mz (ppm) | rt (min) | Formula        | <i>p</i>   | VIP    | Fold Change | KEGG ID | Ion mode |
|---------------------------------------------------|----------|----------|----------------|------------|--------|-------------|---------|----------|
| Phenol                                            | 93.0359  | 402.2545 | C6H6O          | 0.00035092 | 3.0433 | 1.7597      | C15584  | Negative |
| Aryl sulfate                                      | 172.9919 | 401.881  | C6H6O4S        | 0.00039543 | 3.0191 | 1.717       | C00850  | Negative |
| L-Isoleucine                                      | 132.102  | 72       | C6H13NO2       | 0.0010772  | 2.8059 | 0.64602     | C00850  | Positive |
| Sphinganine 1-phosphate                           | 380.2569 | 719.209  | C18H40NO5P     | 0.001119   | 2.7974 | 1.2971      | C01120  | Negative |
| Sphingosine 1-phosphate                           | 378.2416 | 695.233  | C18H38NO5P     | 0.0015811  | 2.7188 | 1.2236      | C06124  | Negative |
| 3beta-Hydroxypregn-5-en-20-one sulfate            | 395.1897 | 700.8085 | C21H32O5S      | 0.0028302  | 2.5798 | 0.45406     | C18044  | Negative |
| 2-Aminophenol                                     | 132.0441 | 401.588  | C6H7NO         | 0.0046788  | 2.4525 | 0.78723     | C01987  | Positive |
| Hydroxylaminobenzene                              | 132.0442 | 421.931  | C6H7NO         | 0.0046788  | 2.4525 | 0.78723     | C02720  | Positive |
| Xanthine                                          | 151.0265 | 178.516  | C5H4N4O2       | 0.0096115  | 2.2567 | 1.3168      | C00385  | Positive |
| 12,13-DHOME                                       | 313.2386 | 761.9115 | C18H34O4       | 0.010227   | 2.239  | 1.4383      | C14829  | Negative |
| 9,10-DHOME                                        | 313.2386 | 761.9115 | C18H34O4       | 0.010227   | 2.239  | 1.4383      | C14828  | Negative |
| 3-Oxo-5beta-cholanate                             | 375.2892 | 674.5295 | C24H38O3       | 0.010553   | 2.23   | 1.5383      | C03070  | Positive |
| S-Hydroxyphenylacetothiohydroximoyl-L-cysteine    | 269.0667 | 398.8475 | C11H14N2O4S    | 0.013159   | 2.1654 | 1.5338      | C17238  | Negative |
| 2-Hydroxy-6-oxo-6'-chlorophenyl-hexa-2,4-dienoate | 251.0174 | 440.1615 | C12H9ClO4      | 0.016195   | 2.103  | 1.9608      | C06587  | Negative |
| Riboflavin                                        | 377.1448 | 402.146  | C17H20N4O6     | 0.01739    | 2.0811 | 0.1534      | C00255  | Positive |
| P1,P4-Bis5'-guanosyl tetraphosphate               | 869.0468 | 496.071  | C20H28N10O21P4 | 0.017428   | 2.0805 | 1.4168      | C01261  | Positive |
| Feruloyl-CoA                                      | 966.1639 | 496.151  | C31H44N7O19P3S | 0.017476   | 2.0796 | 1.3742      | C00406  | Positive |
| N-Acetylneuraminic acid                           | 308.099  | 60       | C11H19NO9      | 0.01785    | 2.0731 | 0.68308     | C19910  | Negative |

|                                                          |          |          |                |          |        |          |        |          |
|----------------------------------------------------------|----------|----------|----------------|----------|--------|----------|--------|----------|
| cis-1,2-Dihydroxy-1,2-dihydro-7-hydroxymethylnaphthalene | 193.0853 | 443.676  | C11H12O3       | 0.020432 | 2.0308 | 1.3046   | C14104 | Positive |
| Coumaryl acetate                                         | 193.0853 | 443.676  | C11H12O3       | 0.020432 | 2.0308 | 1.3046   | C20465 | Positive |
| 7-O-Acetylsalutaridinol                                  | 372.1866 | 401.267  | C21H25NO5      | 0.024439 | 1.9735 | 0.035358 | C05322 | Positive |
| trans,trans-Farnesyl phosphate                           | 325.1518 | 599.179  | C15H27O4P      | 0.024782 | 1.969  | 1.2901   | C20121 | Positive |
| 5-4-Acetoxybut-1-ynyl-2,2'-bithiophene                   | 277.0381 | 443.7325 | C14H12O2S2     | 0.026849 | 1.9428 | 1.3078   | C04485 | Positive |
| Feruloyl-diketide-CoA                                    | 986.1704 | 493.861  | C33H46N7O20P3S | 0.027075 | 1.94   | 1.3157   | C17741 | Positive |
| 6-Phospho-2-dehydro-D-gluconate                          | 296.9933 | 442.2525 | C6H11O10P      | 0.027108 | 1.9396 | 1.6724   | C01218 | Positive |
| Z-3-Hexen-1-ol acetate                                   | 143.1063 | 462.25   | C8H14O2        | 0.029635 | 1.91   | 0.42675  | C19757 | Positive |
| alpha-Oxo-benzeneacetic acid                             | 149.0275 | 386.0625 | C8H6O3         | 0.030348 | 1.902  | 0.76297  | C02137 | Negative |
| 2-Formamido-N1-5'-phosphoribosylacetamide                | 336.0527 | 547.08   | C8H16N3O8P     | 0.030805 | 1.897  | 1.6103   | C04640 | Positive |
| Coniferyl alcohol                                        | 181.0856 | 547.01   | C10H12O3       | 0.033363 | 1.87   | 1.6198   | C00590 | Positive |
| Phenylpyruvate                                           | 182.0887 | 547.024  | C9H8O3         | 0.03566  | 1.8472 | 1.6623   | C00166 | Positive |
| Coniferyl acetate                                        | 223.096  | 546.991  | C12H14O4       | 0.038302 | 1.8224 | 1.558    | C20225 | Positive |
| 2R-2-Hydroxy-2-methylbutanenitrile                       | 100.0762 | 377.837  | C5H9NO         | 0.03991  | 1.808  | 1.5623   | C18796 | Positive |
| Pyrimidine 5'-nucleotide                                 | 294.0632 | 547.033  | C9H14N2O7P     | 0.040522 | 1.8026 | 1.482    | C03536 | Positive |
| Glutaryl-CoA                                             | 882.1536 | 495.3955 | C26H42N7O19P3S | 0.040558 | 1.8023 | 1.2927   | C00527 | Positive |
| Dihydro-O-methylsterigmatocystin                         | 341.1087 | 448.879  | C19H16O6       | 0.040576 | 1.8021 | 1.2673   | C03944 | Positive |
| Indolepyruvate                                           | 204.0606 | 390.7955 | C11H9NO3       | 0.045328 | 1.7627 | 0.79439  | C00331 | Positive |
| Anthraniloyl-CoA                                         | 887.1479 | 495.0895 | C28H41N8O17P3S | 0.049189 | 1.7332 | 1.2739   | C02247 | Positive |

Abbreviations: GCC: good collateral circulation; PCC: poor collateral circulation; VIP: Variable importance in projection; Fold change: GCC/PCC.

Table S5 Result of metabolic enrichment analysis between GCC and PCC groups

| Pathways                                            | total | expected | hits | Raw <i>p</i> |
|-----------------------------------------------------|-------|----------|------|--------------|
| Sphingolipid metabolism                             | 21    | 0.359    | 2    | 0.0483       |
| Phenylalanine, tyrosine and tryptophan biosynthesis | 4     | 0.0683   | 1    | 0.0667       |
| Riboflavin metabolism                               | 4     | 0.0683   | 1    | 0.0667       |
| Tryptophan metabolism                               | 41    | 0.7      | 2    | 0.153        |
| Phenylalanine metabolism                            | 10    | 0.171    | 1    | 0.159        |
| Purine metabolism                                   | 65    | 1.11     | 2    | 0.306        |
| Lysine degradation                                  | 25    | 0.427    | 1    | 0.352        |
| Amino sugar and nucleotide sugar metabolism         | 37    | 0.632    | 1    | 0.475        |
| Fatty acid degradation                              | 39    | 0.666    | 1    | 0.494        |

Table S6 Result of KEGG metabolic pathways analysis between GCC and PCC groups

| Pathways                                            | Total | Expected | Hits | Raw <i>p</i> | Impact  |
|-----------------------------------------------------|-------|----------|------|--------------|---------|
| Sphingolipid metabolism                             | 21    | 0.35226  | 2    | 0.046739     | 0.04868 |
| Phenylalanine, tyrosine and tryptophan biosynthesis | 4     | 0.067097 | 1    | 0.065489     | 0       |
| Riboflavin metabolism                               | 4     | 0.067097 | 1    | 0.065489     | 0.5     |
| Purine metabolism                                   | 65    | 1.0903   | 3    | 0.092077     | 0.06287 |
| Tryptophan metabolism                               | 41    | 0.68774  | 2    | 0.14906      | 0.00179 |
| Phenylalanine metabolism                            | 10    | 0.16774  | 1    | 0.15605      | 0.2619  |
| Lysine degradation                                  | 25    | 0.41935  | 1    | 0.34705      | 0.13146 |
| Fatty acid degradation                              | 39    | 0.65419  | 1    | 0.48729      | 0       |
| Steroid hormone biosynthesis                        | 85    | 1.4258   | 1    | 0.77207      | 0       |

Table S7 Logistic regression analysis of the association between S1P levels and AIS patients (control vs. AIS)

|                    | P value | OR (95% CI)           |
|--------------------|---------|-----------------------|
| Hypertension       | 0.112   | 3.016 (0.773-11.766)  |
| Diabetes mellitus  | 0.026   | 7.054 (1.258-39.572)  |
| S1P>244.49 (ng/mL) | 0.002   | 8.363 (2.129 -32.853) |
| SBP>136.00 mmHg    | 0.639   | 1.375 (0.364-5.199)   |
| TC>4.37mmol/L      | 0.539   | 0.447 (0.034-5.199)   |
| HDL>1.09 mmol/L    | 0.074   | 0.247 (0.053-1.144)   |
| LDL>2.82mmol/L     | 0.786   | 1.395 (0.126-15.46)   |

Abbreviations: AIS: acute ischemic stroke; S1P: sphingosine-1-phosphate; SBP: systolic blood pressure; TC: total cholesterol; HDL: high-density lipoprotein; LDL: low density lipoprotein.
